# Supplementary material for: New ICT-based Ratiometric Two-Photon Near Infrared Probe for Imaging Tyrosinase in Living Cells, Tissues and Whole Organisms
Source: Preprints.org preprint supplement (doi:10.20944/preprints202301.0409.v1), 2023-01-23
Supplement: Supplementary file 2 [file supplementary]

Archive with 3 entries (3 files):
- SUPPORTING INFORMATION.pdf
- Video S1.mp4
- Video S2.mp4
